# Supplementary material
Source: PubMed Central journal article supplement (PMC5810941)

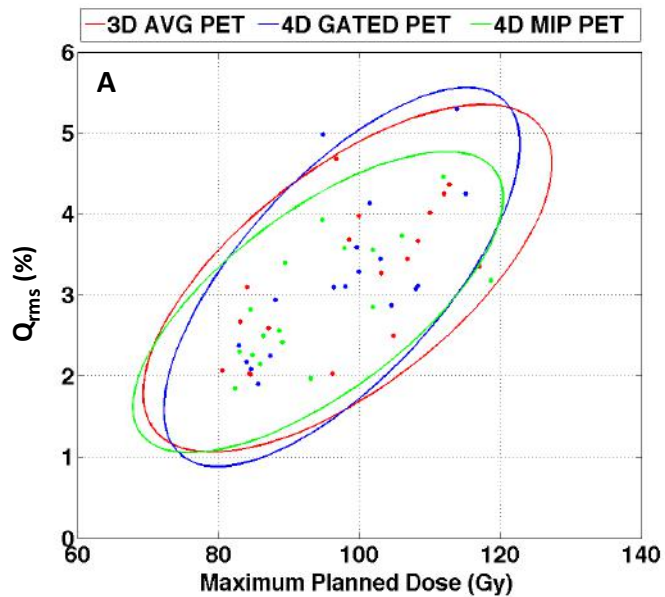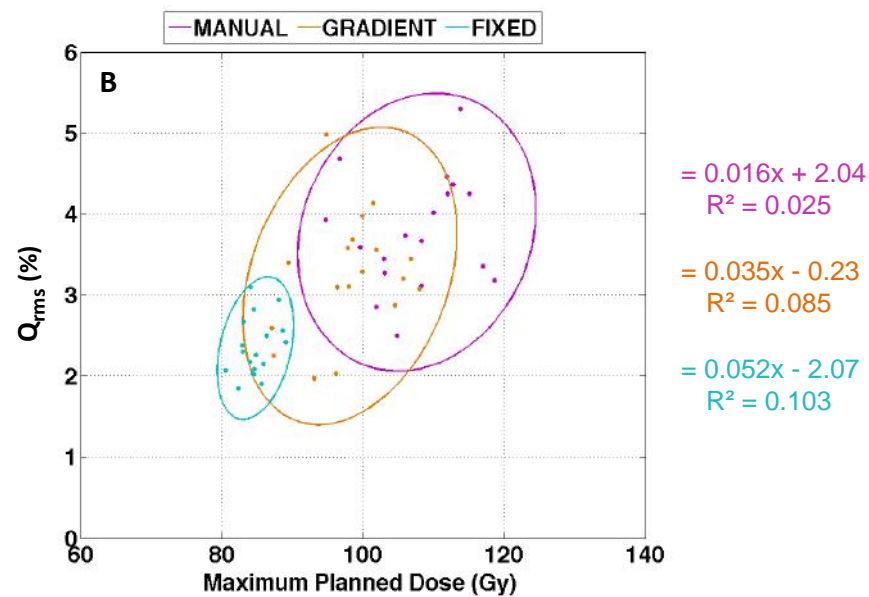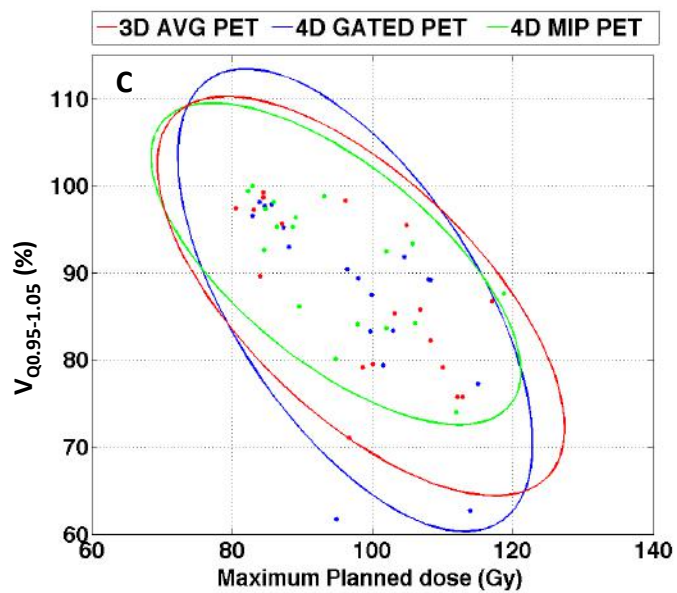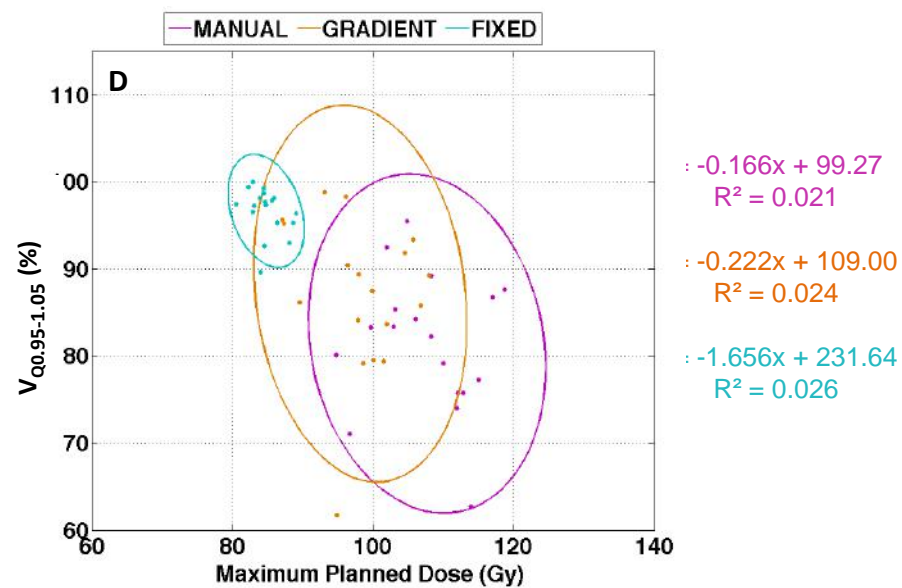

Supplement: NIHMS928828-supplement-Figure_A1.pdf [file NIHMS928828-supplement-Figure_A1.pdf]
